# Supplementary material for: The Wnt/TCF7L1 transcriptional repressor axis drives primitive endoderm formation by antagonizing naive and formative pluripotency
Source: PubMed Central journal article supplement (PMC9984534; doi:10.1038/s41467-023-36914-1), 2023-03-03
Supplement: 41467_2023_36914_MOESM1_ESM.pdf [file 41467_2023_36914_MOESM1_ESM.pdf]

# Supplementary Information

## **The Wnt/TCF7L1 transcriptional repressor axis drives primitive endoderm formation by antagonizing naive and formative pluripotency**

Paraskevi Athanasouli <sup>1,10</sup>, Martina Balli <sup>1,10</sup>, Anchel De Jaime-Soguero <sup>1, \*</sup>, Annekatrien Boel <sup>2</sup>, Sofia Papanikolaou <sup>3,4</sup>, Bernard K. van der Veer <sup>1</sup>, Adrian Janiszewski <sup>1</sup>, Tijs Vanhessche <sup>1</sup>, Annick Francis <sup>5</sup>, Youssef El Laithy <sup>1</sup>, Antonio Lo Nigro <sup>1</sup>, Francesco Aulicino <sup>6</sup>, Kian Peng Koh <sup>1</sup>, Vincent Pasque <sup>1,7</sup>, Maria Pia Cosma <sup>6,8,9</sup>, Catherine Verfaillie <sup>1</sup>, An Zwijsen <sup>5</sup>, Björn Heindryckx <sup>2</sup>, Christoforos Nikolaou <sup>4</sup>, and Frederic Lluis<sup>1,\*</sup>

<sup>1</sup> KU Leuven, Department of Development and Regeneration, Stem Cell Institute, B-3000, Leuven, Belgium

<sup>2</sup> Ghent-Fertility And Stem cell Team (G-FaST), Department for Reproductive Medicine, Department for Human Structure and Repair, Ghent University Hospital, 9000, Ghent, Belgium

<sup>3</sup> Department of Rheumatology, Clinical Immunology, Medical School, University of Crete, 70013, Heraklion, Greece

<sup>4</sup> Computational Genomics Group, Institute of Bioinnovation, Biomedical Sciences Research Center "Alexander Fleming", 16672, Athens, Greece

<sup>5</sup> Department of Cardiovascular Sciences, KU Leuven, 3000, Leuven, Belgium

<sup>6</sup> Centre for Genomic Regulation (CRG), Dr Aiguader 88, 08003, Barcelona, Spain

<sup>7</sup> KU Leuven Institute for Single-Cell Omics (LISCO), 3000, Leuven, Belgium

<sup>8</sup> ICREA, Pg. Lluis Companys 23, Barcelona 08010, Spain

<sup>9</sup> Universitat Pompeu Fabra (UPF), Barcelona, Spain

<sup>10</sup> These authors contributed equally

\*email: [anchel.dejaime@cos.uni-heidelberg.de](mailto:anchel.dejaime@cos.uni-heidelberg.de)

[Frederic.lluisvinas@kuleuven.be](mailto:Frederic.lluisvinas@kuleuven.be)

Supplementary Figure 1

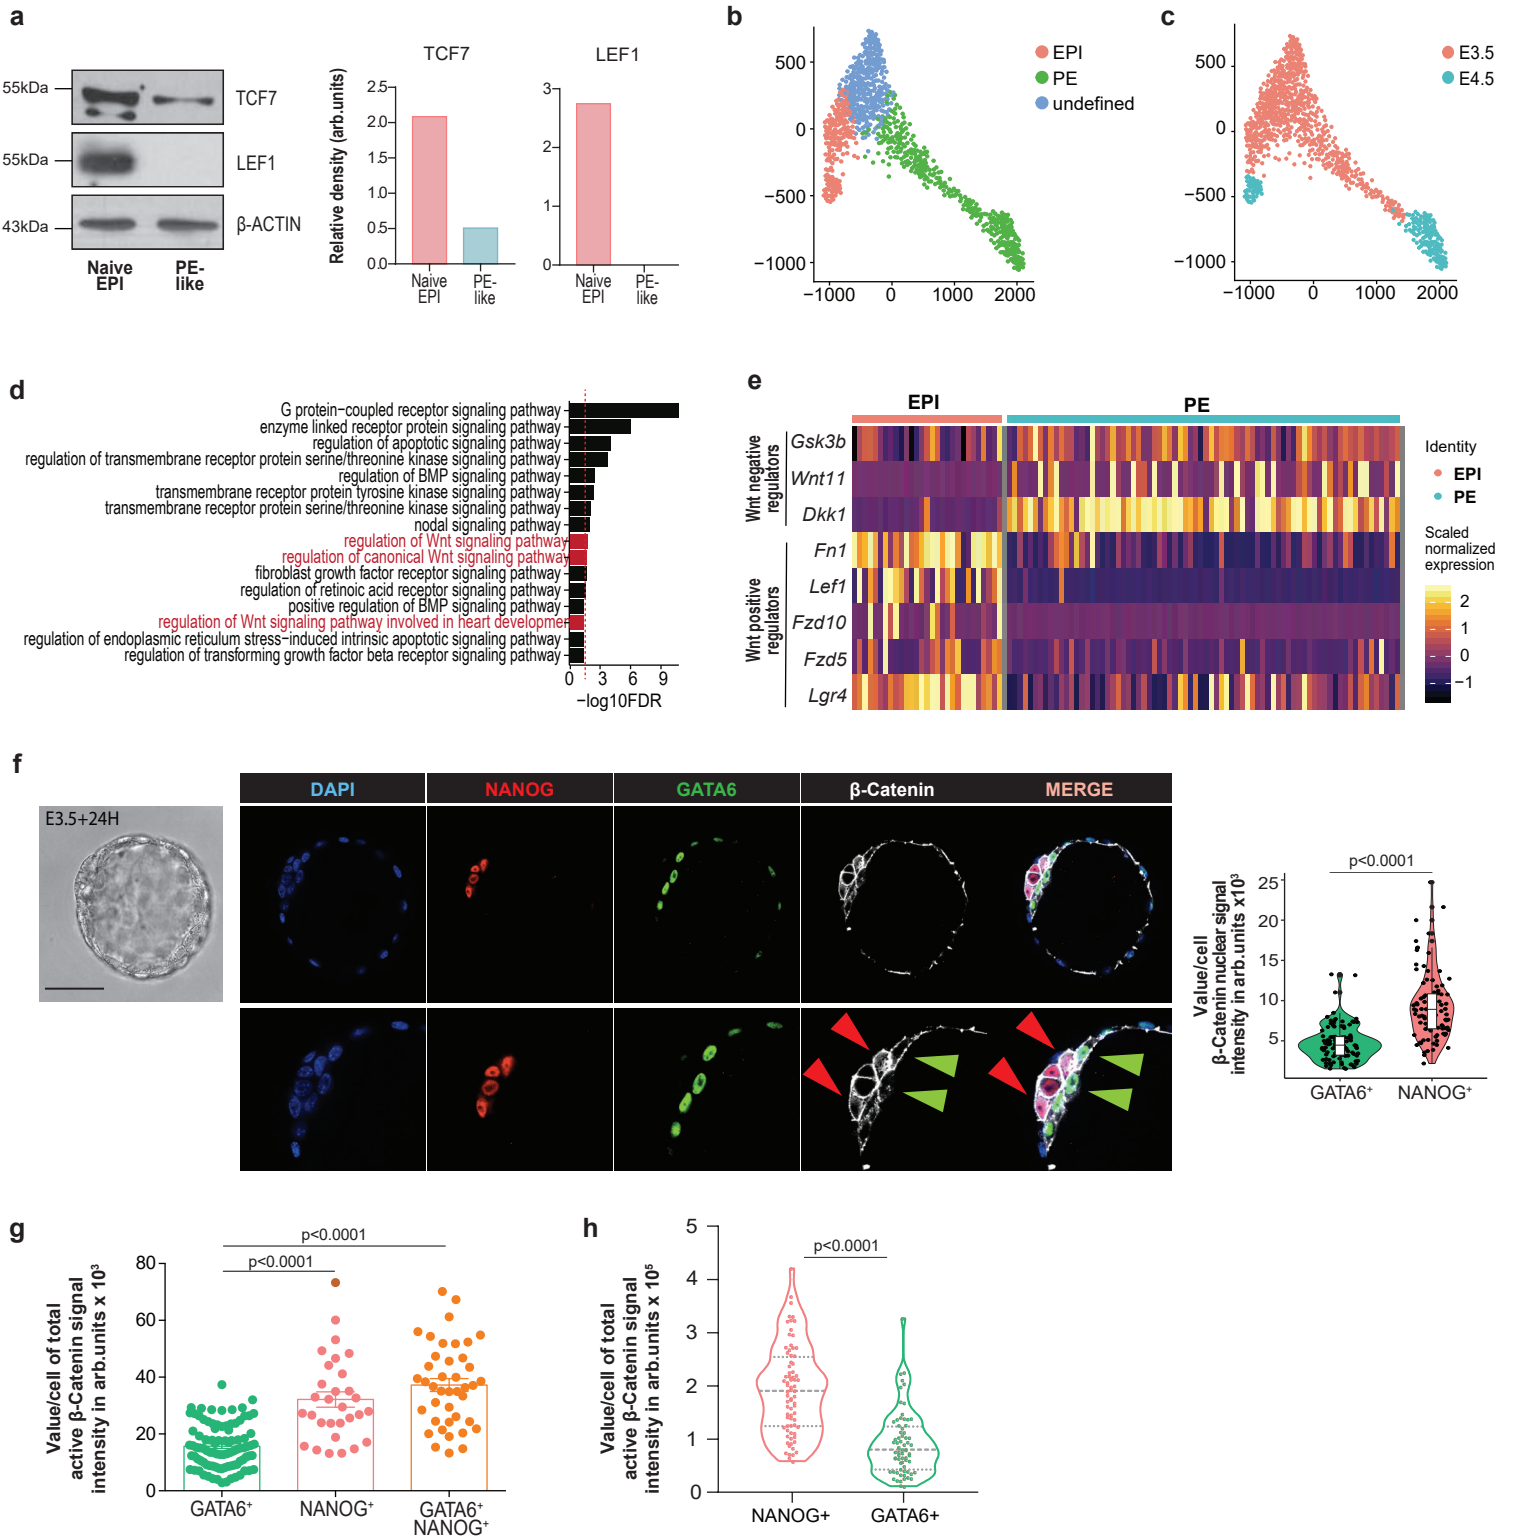

**Supplementary Fig. 1: PE cells are characterized by a diminished Wnt/ $\beta$ -Catenin signaling activity compared to the EPI lineage.**

**(a)** TCF7 and LEF1 protein levels in naive EPI and PE-like cells from 1 experiment. **(b)** Force-directed layout displaying relationships between undefined ICM, EPI and PE cells. Cells are colored by lineage<sup>50</sup>. **(c)** Force-directed layout of E3.5 and E4.5 cells. Cells are colored by embryo developmental timepoint<sup>50</sup>. **(d)** GO enrichment analysis of DEGs between EPI and PE lineages in E4.5 preimplantation embryos<sup>49</sup>. Red dashed line=FDR 0.05. **(e)** Differential Wnt signaling transcriptome profile between EPI and PE lineages in E4.5 preimplantation embryos<sup>49</sup>. **(f)** (Left) Representative immunofluorescence (IF) image of active  $\beta$ -Catenin protein signal in E3.5+24H *ex vivo* cultured embryos. EPI-NANOG<sup>+</sup> cells (red arrow) and PE-GATA6<sup>+</sup> cells (green arrow). Scale bar=50 $\mu$ M. Zoomed region of interest is reported below the images. (Right) Nuclear active  $\beta$ -Catenin signal intensity in EPI-NANOG<sup>+</sup> and PE-GATA6<sup>+</sup>. NANOG<sup>+</sup> n=91, GATA6<sup>+</sup> n=100; 2 independent experiments; two-tailed unpaired *t* test. Horizontal line denotes the median value, box indicates the interquartile range (IQR) and whiskers denote the 1.5  $\times$  IQR. **(g)** Total active  $\beta$ -Catenin signal intensity in EPI-NANOG<sup>+</sup>, PE-GATA6<sup>+</sup> and double-positive NANOG<sup>+</sup>/GATA6<sup>+</sup> cells in E3.5 embryos. Mean  $\pm$  SEM; NANOG<sup>+</sup> n=30, GATA6<sup>+</sup> n=93 and undefined NANOG<sup>+</sup>/GATA6<sup>+</sup> cells n=41; 2 independent experiments; one-way ANOVA test. **(h)** Total active  $\beta$ -Catenin signal intensity in EPI-NANOG<sup>+</sup> and PE-GATA6<sup>+</sup> cells. Integrated intensity in arbitrary units (arb. units). NANOG<sup>+</sup> n=76; GATA6<sup>+</sup> n=69; 2 independent experiments; two-tailed unpaired *t* test. Source data for all experiments are provided as a Source data file.

Supplementary Figure 2

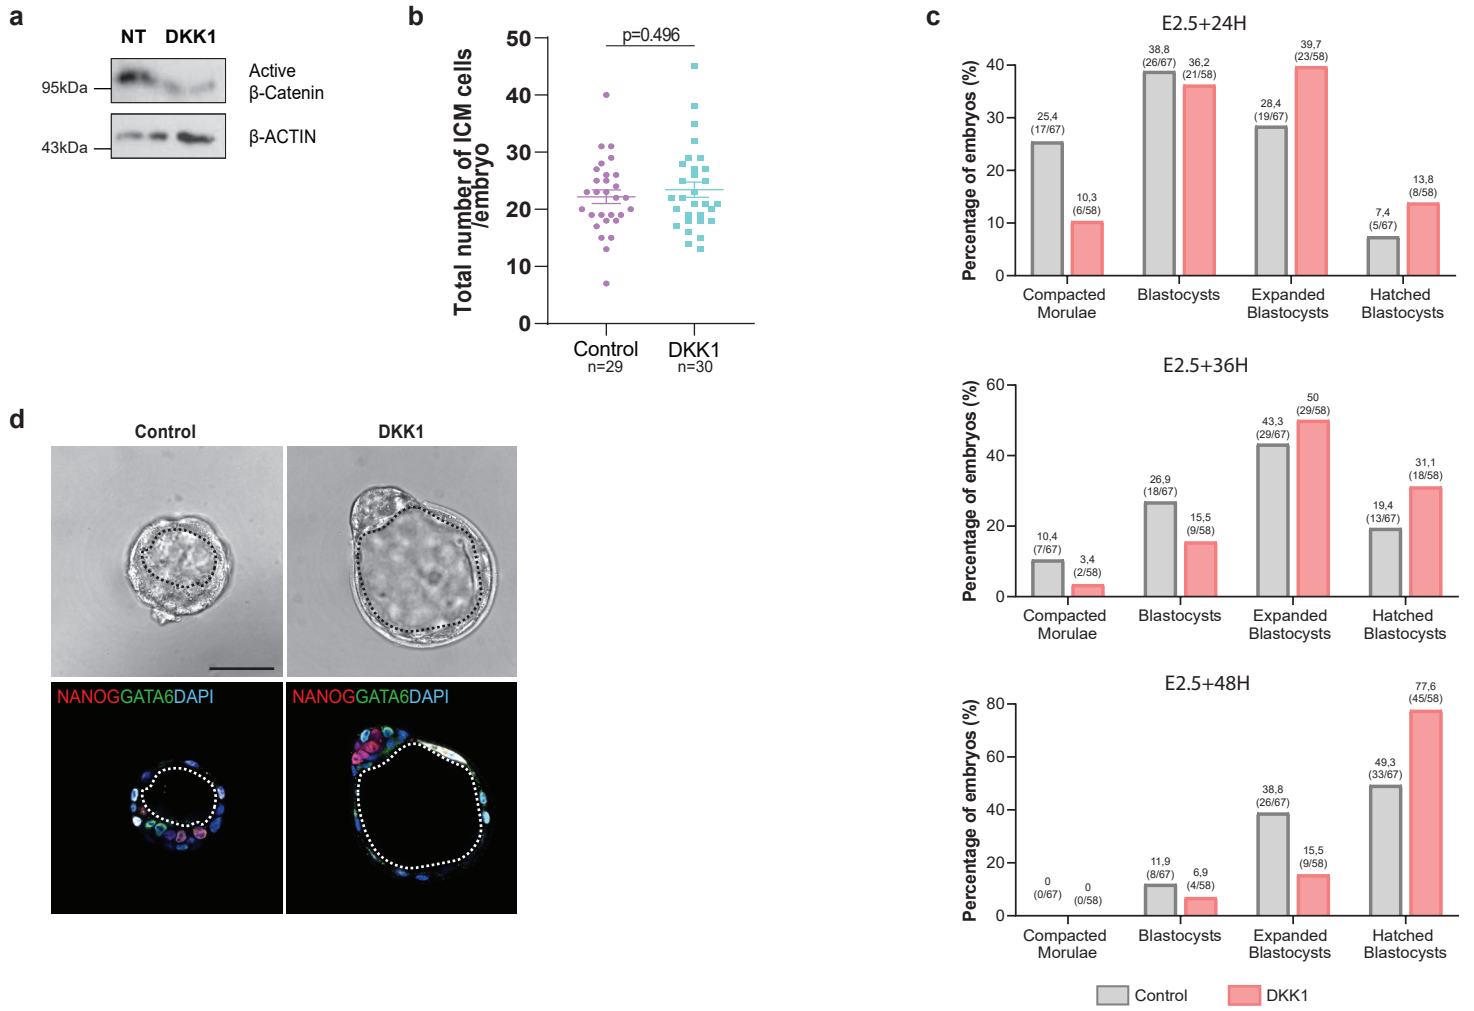

**Supplementary Fig. 2: Wnt signaling inhibition as major contributor of PE lineage development.**

**(a)** Representative images of active  $\beta$ -Catenin levels in mESCs upon DKK1 treatment for 3 passages from 3 independent experiments. **(b)** Total number of ICM cells per embryo. Mean  $\pm$  SEM; Control: n=29, DKK1: n=30; 3 independent experiments; two-tailed unpaired *t* test. **(c)** Effect of DKK1 on mouse embryo developmental kinetics. Bars represent percentage of each developmental stage in each treatment group. Combined data of 2 *in vitro* culture sessions; see Source data file. **(d)** Representative IF image of embryo morphology upon DKK1 treatment from 3 independent experiments. Scale bar=50 $\mu$ M. Source data are provided in the Source data file.

Supplementary Figure 3

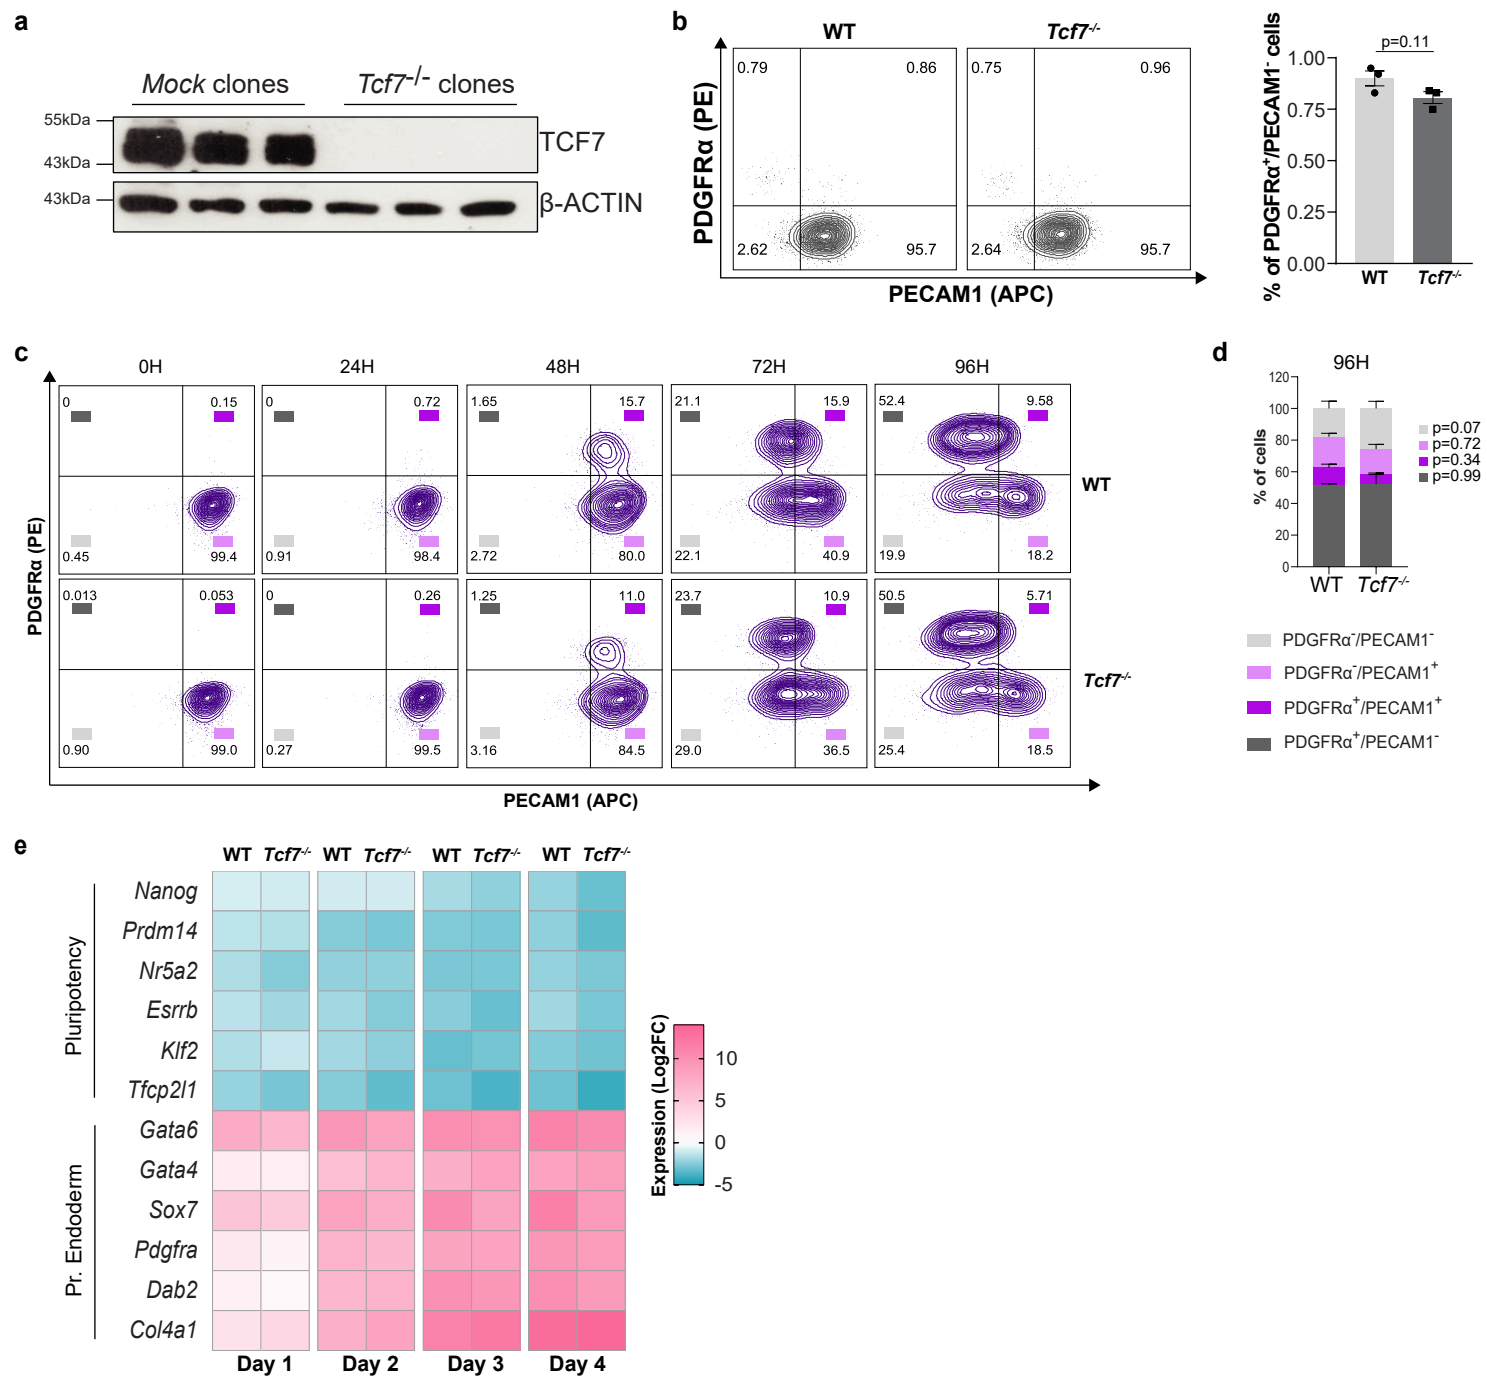

**Supplementary Fig. 3: Loss of *Tcf7* does not affect PE specification.**

**(a)** TCF7 protein levels in three independent mock and *Tcf7*<sup>-/-</sup> clones from 1 experiment. **(b)** (Left) Representative flow cytometry images of mESC populations co-stained for PECAM1 and PDGFR $\alpha$  in WT and *Tcf7*<sup>-/-</sup> cells. (Right) Flow cytometry analysis of PDGFR $\alpha$ <sup>+</sup>/PECAM1<sup>-</sup> cells in WT and *Tcf7*<sup>-/-</sup> cells. Mean  $\pm$  SD; n=3 independent experiments. two-tailed unpaired *t* test. **(c)** Representative flow cytometric images of mESC populations co-stained for PECAM1 and PDGFR $\alpha$  markers in WT and *Tcf7*<sup>-/-</sup> cells upon 0, 24, 48, 72 and 96H of 0.25 $\mu$ M RA treatment. n=3. **(d)** Flow cytometry analysis of PDGFR $\alpha$  and PECAM1 populations at 96H of RA treatment. Mean  $\pm$  SD; n=3 independent experiments; two-way ANOVA test. **(e)** Gene expression analysis of pluripotency and PE gene markers in WT and *Tcf7*<sup>-/-</sup> upon RA differentiation. Gene expression values are reported as Log<sub>2</sub> of fold change expression. Source data for all experiments are provided as a Source data file.

Supplementary Figure 4

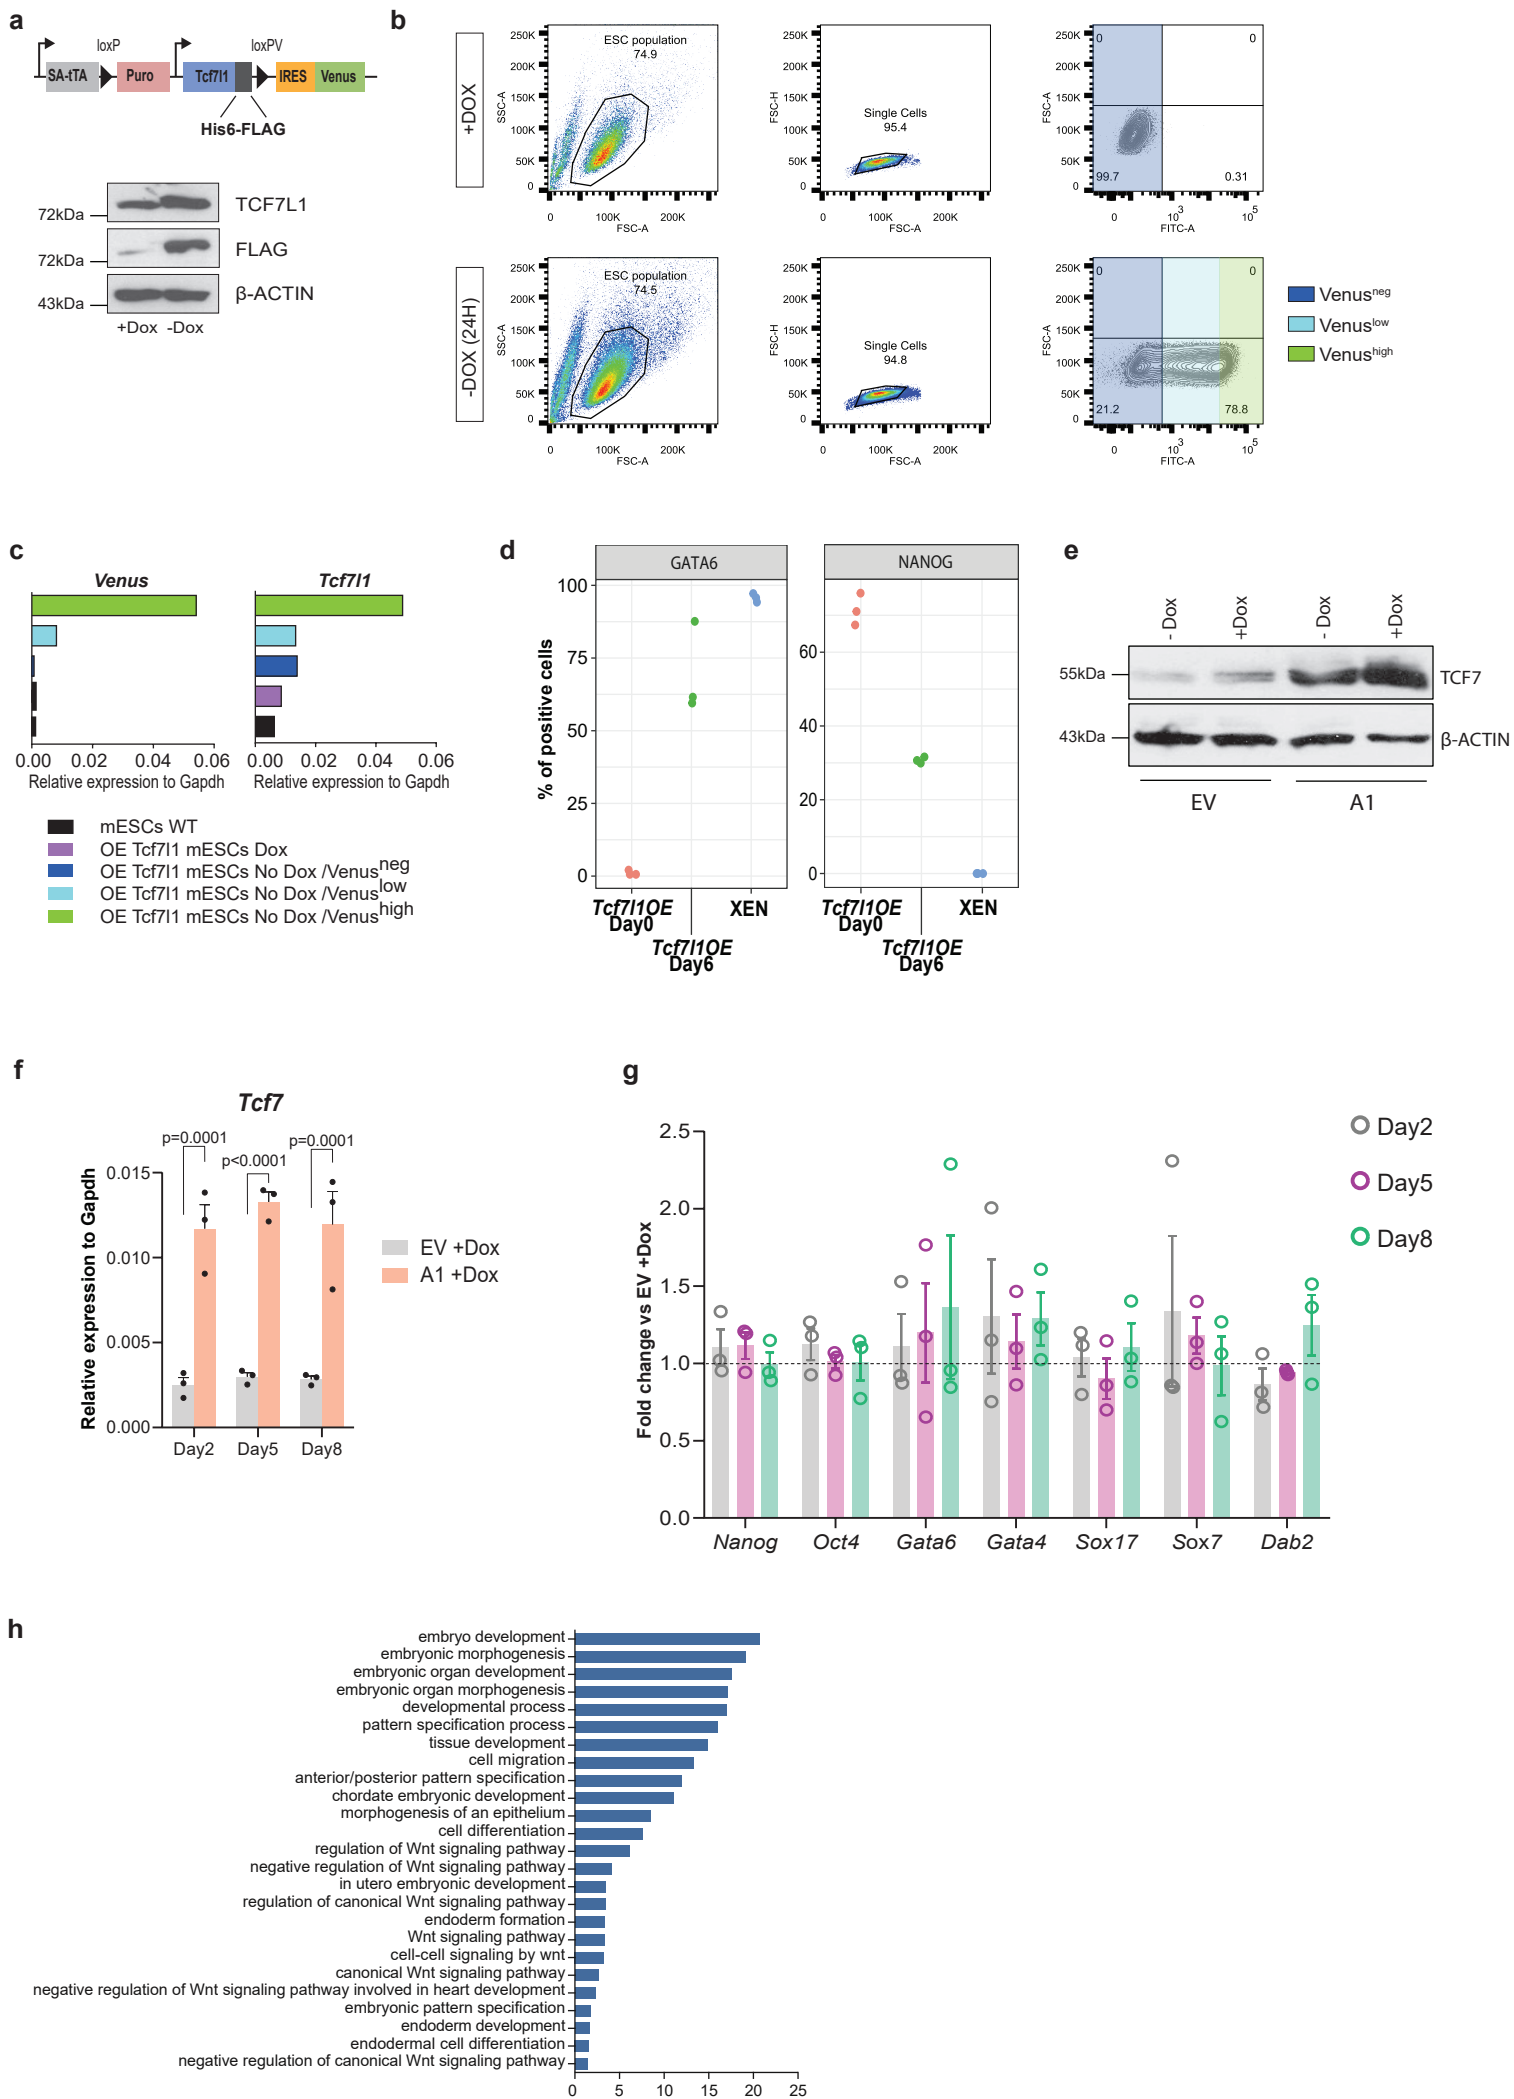



**Supplementary Fig. 4: *Tcf7l1* overexpression promotes PE specification while TCF7 has negligible role in PE induction.**

**(a)** (Upper panel) Schematic representation of *Tcf7l1* transgene as designed by Nishiyama et al. 2009. (Lower panel) TCF7L1 and FLAG protein levels in uninduced (+Dox) and 24h induced cells (-Dox). Representative of 3 independent experiments. **(b)** Venus/FITC expression in uninduced (+Dox) and 24H induced cells (-Dox). Exemplary sorting gating strategy for experiments presented in Fig. 4a-e, Supplementary Fig.4c,d and RNA sequencing samples. Colored areas separate negative, low and high *Venus*-expressing populations. *Venus*<sup>high</sup> population was sorted (last panel) **(c)** qRT-PCR of *Venus* and *Tcf7l1* in sorted cell populations after 24h of transgene induction. Populations were sorted based on *Venus* expression into *Venus*<sup>neg</sup>, *Venus*<sup>low</sup> and *Venus*<sup>high</sup>. WT mESCs and uninduced (+Dox) cells were used as control. Gene expression was normalized to *Gapdh*. **(d)** Percentage of GATA6 and NANOG positive nuclei normalized on the total number of cells (DAPI signal); see Source data file. Each dot represents a field of view. **(e)** TCF7 levels upon transgene induction with Dox treatment. EV: empty vector, A1: cell clone with stably incorporated transgene cassette. Representative of 3 independent experiments. **(f)** qRT-PCR of *Tcf7* upon transgene induction for 2, 5 and 8 days. EV treated with Dox was used as control. Mean  $\pm$  SD; n=3 independent experiments; see Source data file. Two-way ANOVA test. **(g)** qRT-PCR of pluripotency and PE genes normalized to *Gapdh* upon *Tcf7* overexpression for 2, 5 and 8 days. Values are reported as fold change relative to EV treated with Dox. Mean  $\pm$  SEM; n=3 independent experiments; see Source data file; multiple unpaired *t* tests with Holm-Sidak method; no statistically significant differences detected. **(h)** GO enrichment analysis of upregulated genes after 8 days of *Tcf7l1* OE.

Supplementary Figure 5

**a**

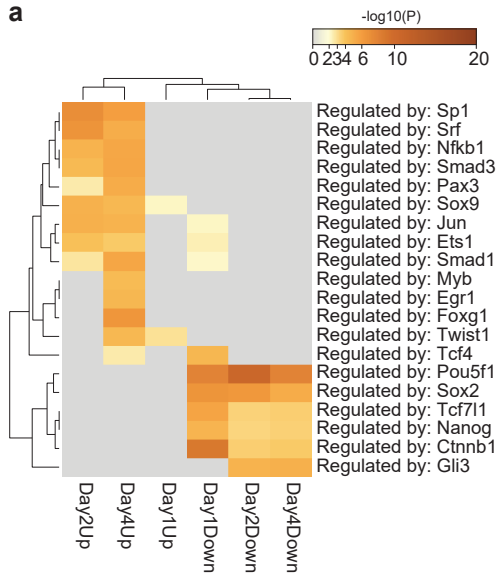

**b**

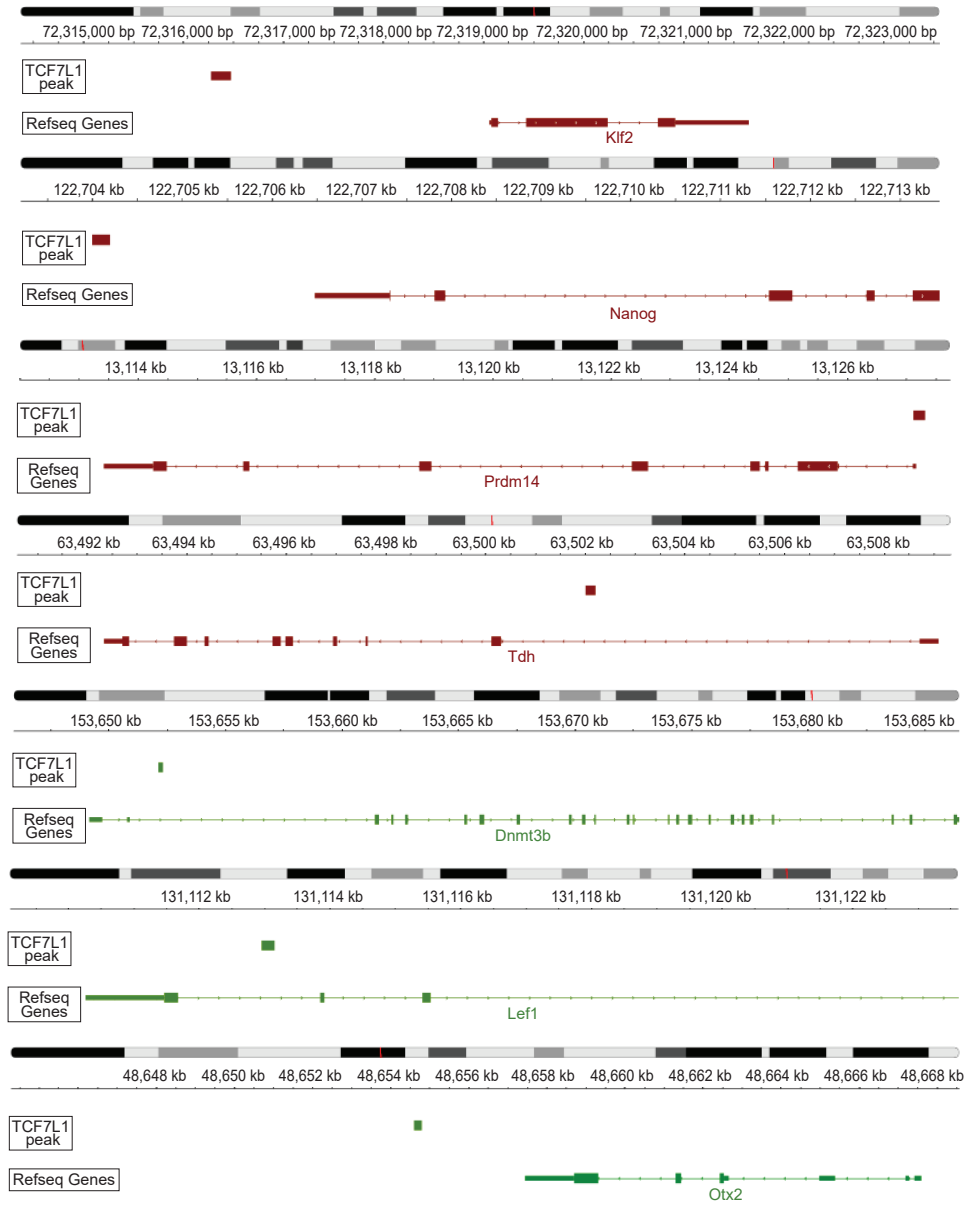

**Supplementary Fig. 5 *Tcf7l1* overexpression promotes conversion to PE fate through a downregulation of naive and formative pluripotency.**

**(a)** Transcriptional regulator target gene enrichments for genes up- or down-regulated at D1, D2 and D4 of *Tcf7l1* induction. Genes were selected at  $|\logFC| \geq 2$  and adjusted p-value  $\leq 0.05$ .

**(b)** Genomic regions around genes associated with naive, general and formative pluripotency genes with TCF7L1 binding peaks around the TSS region.

Supplementary Figure 6

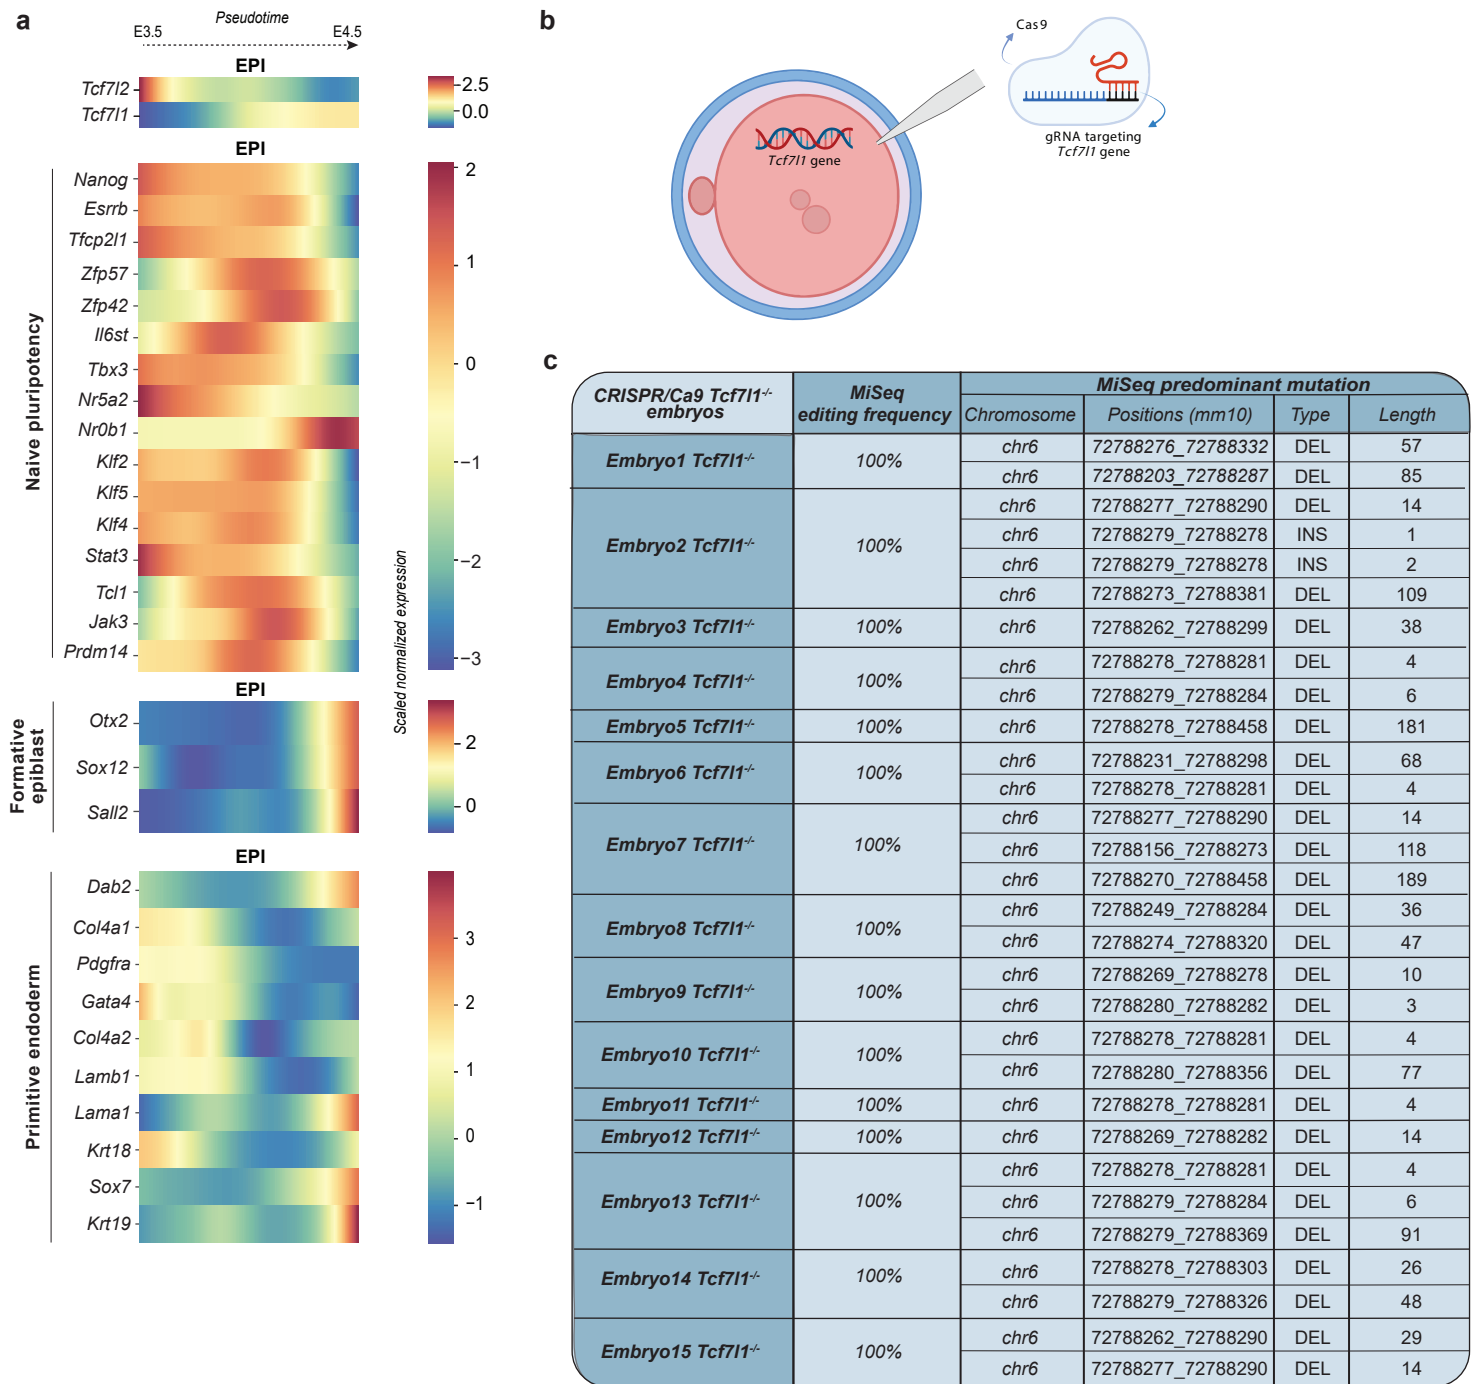

**Supplementary Fig. 6 TCF7L1 as main regulator of *in vivo* PE cell fate specification.**

**(a)** *Tcf7l1* and *Tcf7l2* gene expression profile in EPI lineage from E3.5 to E4.5 compared to gene expression levels of different lineage markers. **(b)** Schematic representation of CRISPR/Cas9 *in vivo* experiment. Created with BioRender.com. **(c)** MiSeq results of CRISPR/Cas9 *Tcf7l1*<sup>-/-</sup> embryos.

Supplementary Figure 7

**a**

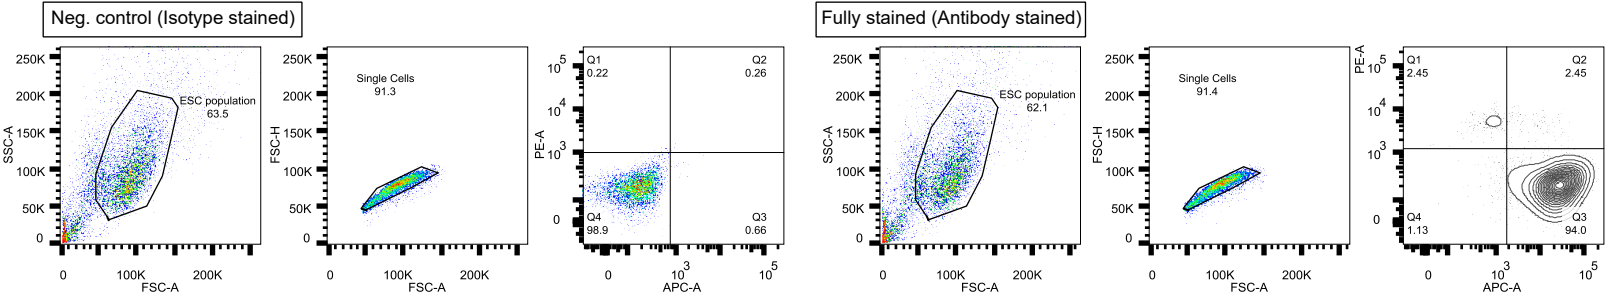

**b**

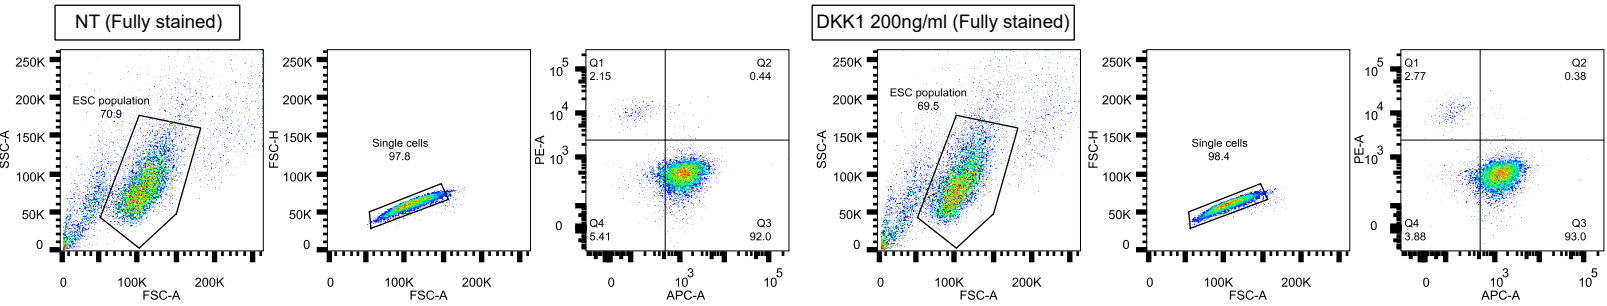

**c**

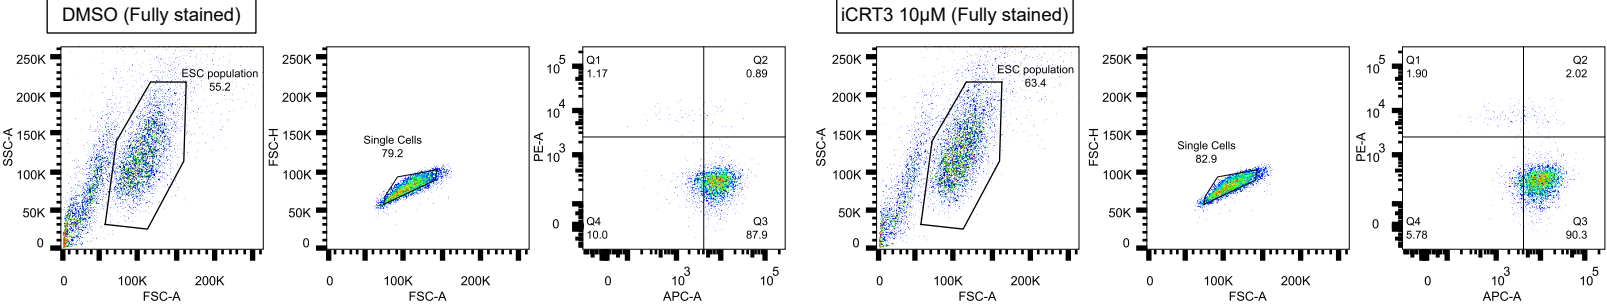

**d**

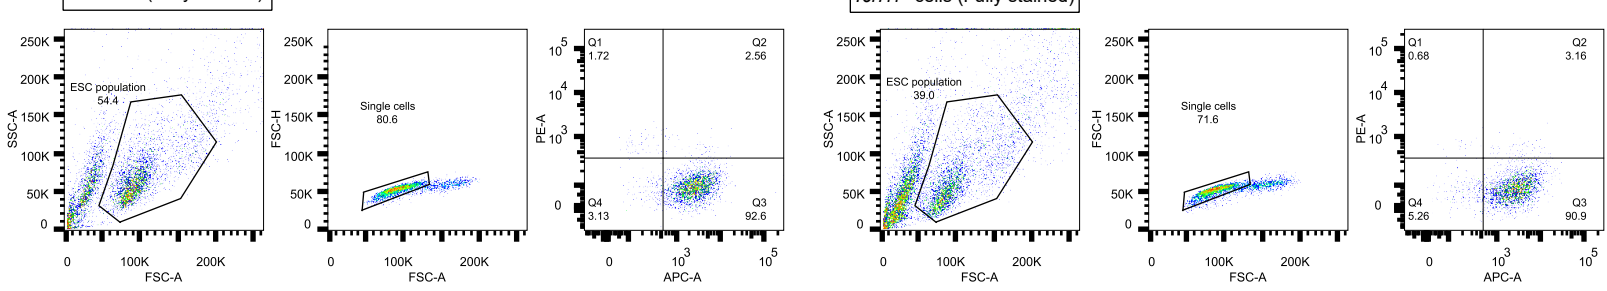

**e**

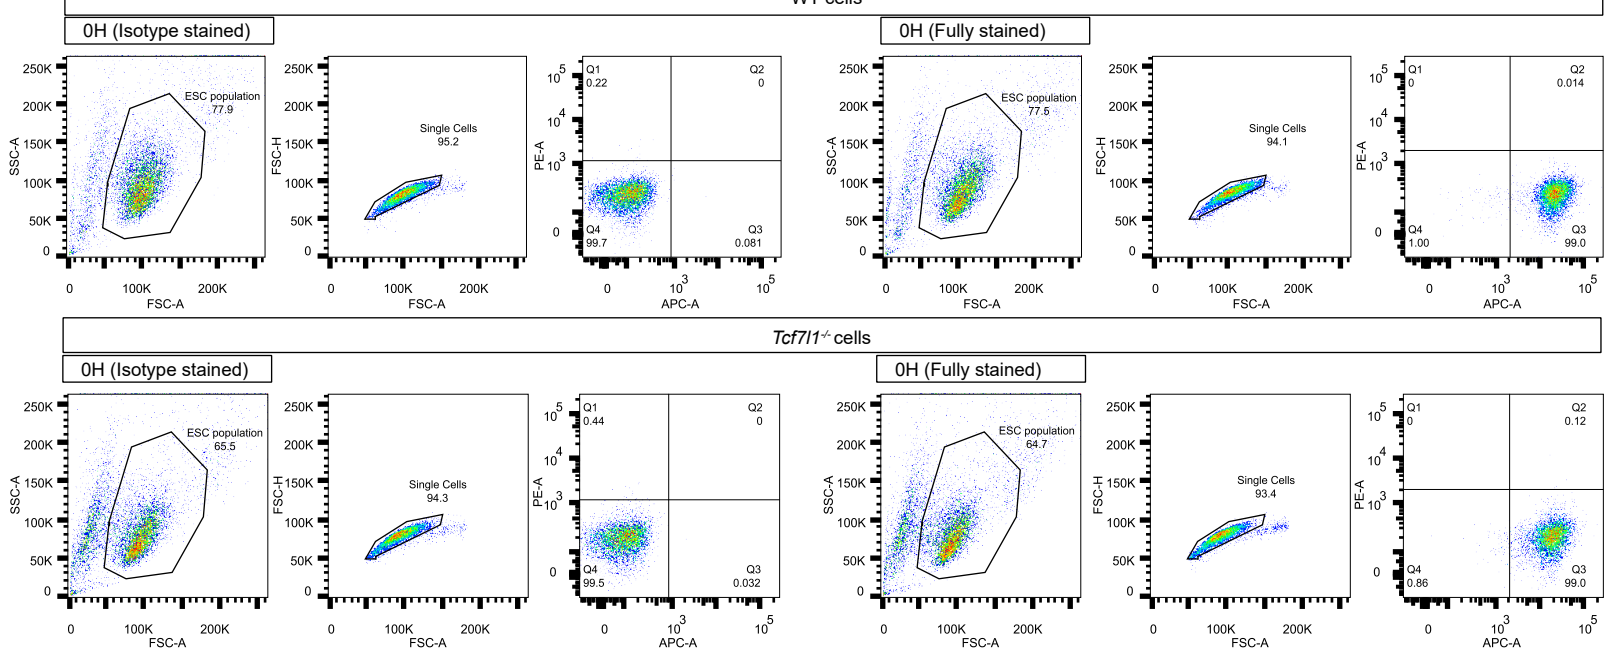

**Supplementary Fig. 7: Gating strategies employed for FACS plots presented in the manuscript figures.**

**(a)** Exemplary gating strategy to identify naive EPI (PECAM1<sup>+</sup>/PDGFR $\alpha$ <sup>-</sup>) and PE-like populations (PECAM1<sup>-</sup>/PDGFR $\alpha$ <sup>+</sup>) used in Fig. 1b-e and Supplementary Fig. 1a. **(b)** Exemplary gating strategy to identify the PE-like population (PECAM1<sup>-</sup>/PDGFR $\alpha$ <sup>+</sup>) in NT and DKK1 treated cells presented in Fig. 2a. **(c)** Exemplary gating strategy to identify the PE-like population (PECAM1<sup>-</sup>/PDGFR $\alpha$ <sup>+</sup>) in DMSO and iCRT3 treated cells presented in Fig. 3a. **(d)** Exemplary gating strategy to identify the PE-like population (PECAM1<sup>-</sup>/PDGFR $\alpha$ <sup>+</sup>) in WT and *Tcf7l1*<sup>-/-</sup> or *Tcf7*<sup>-/-</sup> cells presented in Fig. 3c,d and Supplementary Fig. 3b. **(e)** Exemplary gating strategy to identify naive EPI (PECAM1<sup>+</sup>/PDGFR $\alpha$ <sup>-</sup>), PE-like (PECAM1<sup>-</sup>/PDGFR $\alpha$ <sup>+</sup>) and the intermediate populations in WT and *Tcf7l1*<sup>-/-</sup> or *Tcf7*<sup>-/-</sup> cells during RA timecourse presented in Fig. 3e,f and Supplementary Fig. 3c,d.

Supplementary Figure 8

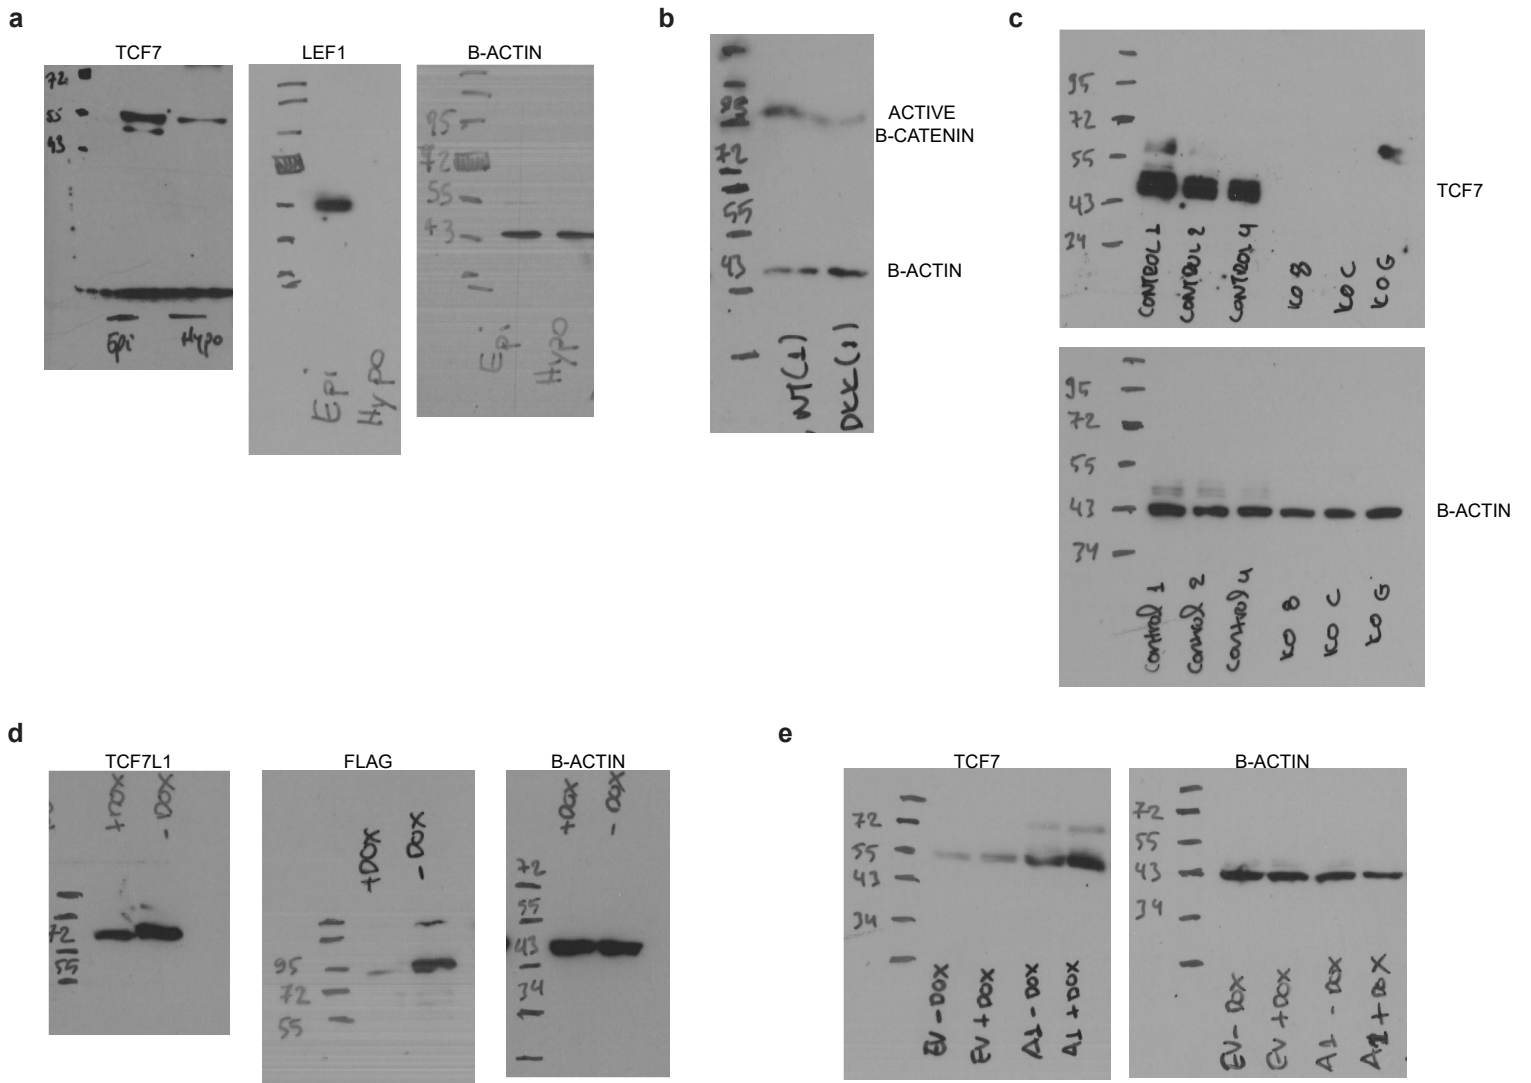

Supplementary Fig. 8: Uncropped and unprocessed scans of blots presented in Supplementary Figures.



Supplementary Table 1: Antibodies

| NAME                                                       | SOURCE                    | IDENTIFIER                     |
|------------------------------------------------------------|---------------------------|--------------------------------|
| <b>Antibodies</b>                                          |                           |                                |
| Rat monoclonal anti-Nanog                                  | eBioscience™              | Cat#14-5761-80; RRID:AB_763613 |
| Goat polyclonal anti-Gata6                                 | R&D systems               | Cat#AF1700, RRID:AB_2108901    |
| Mouse monoclonal anti-Gata4                                | BD Biosciences            | Cat#560327, RRID:AB_1645188    |
| Mouse monoclonal anti-Cdx2                                 | Biogenex                  | Cat#AM392GP                    |
| Rabbit monoclonal anti-(active)- $\beta$ -catenin          | Cell Signaling Technology | Cat#8814, RRID:AB_11127203     |
| Goat polyclonal anti-Tcf3 (M-20) (Tcf7l1)                  | Santa Cruz Biotechnology  | Cat#sc-8635, RRID:AB_2199133   |
| Goat polyclonal anti-Nestin                                | Santa Cruz Biotechnology  | Cat#sc-21248, RRID:AB_2148925  |
| Mouse monoclonal anti- $\beta$ -catenin                    | BD Biosciences            | Cat#610154, RRID:AB_397555     |
| Rabbit monoclonal anti-Tcf1 (C63D9)                        | Cell Signaling Technology | Cat#2203, RRID:AB_2199302      |
| Rabbit monoclonal anti-Lef1 (C12A5)                        | Cell Signaling Technology | Cat#2230, RRID:AB_823558       |
| Mouse anti- $\beta$ -Actin (C4)                            | Santa Cruz Biotechnology  | Cat#sc-47778, RRID:AB_626632   |
| PE anti-mouse CD140a (PDGFRA) (APA5)                       | Thermo Fisher Scientific  | Cat#12-1401-81, RRID:AB_657615 |
| APC anti-mouse CD31 (PECAM-1) (390)                        | Thermo Fisher Scientific  | Cat#17-0311-82, RRID:AB_657735 |
| PE Rat IgG2 $\alpha$ , $\kappa$ Isotype Clone R35-95 (RUO) | BD Biosciences            | Cat#553930, RRID:AB_479719     |
| APC Rat IgG2 $\alpha$ , $\kappa$ Isotype (eBR2a)           | Thermo Fisher Scientific  | Cat#17-4321-81, RRID:AB_470181 |

Supplementary Table 2: Reagents and resources

| NAME                                                              | SOURCE                       | IDENTIFIER                          |
|-------------------------------------------------------------------|------------------------------|-------------------------------------|
| <b>Chemicals, Peptides, and Recombinant Proteins</b>              |                              |                                     |
| XAV939                                                            | Sigma Aldrich                | Cat#X3004                           |
| PD0325901                                                         | Sigma Aldrich                | Cat#PZ0162                          |
| CHIR99021                                                         | Sigma Aldrich                | Cat#SML1046                         |
| Retinoic acid                                                     | Sigma Aldrich                | Cat#R2625                           |
| iCRT3                                                             | Sigma Aldrich                | Cat#SML0211                         |
| Doxycycline (Dox)                                                 | Sigma Aldrich                | Cat#D9891                           |
| Phosphatase inhibitor Cocktail 2                                  | Sigma Aldrich                | Cat# P5726                          |
| Phosphatase inhibitor Cocktail 3                                  | Sigma Aldrich                | Cat# P0044                          |
| Protease inhibitor cocktail                                       | Sigma Aldrich                | Cat# P8340                          |
| Recombinant Murine LIF                                            | Peprotech                    | Cat#250-02                          |
| Recombinant Human/Murine/Rat Activin A                            | Peprotech                    | Cat#120-14E                         |
| Recombinant Human FGF-basic                                       | Peprotech                    | Cat#100-18B                         |
| Recombinant Human DKK-1                                           | Peprotech                    | Cat#120-30                          |
| Chorionic gonadotropin human                                      | Sigma Aldrich                | Cat#CG10-1VL                        |
| Cook Blasto                                                       | Cook Ireland Ltd, Ireland    | Cat# G46296                         |
| N2 Supplement                                                     | Thermo Fisher Scientific     | Cat#17502048                        |
| B27 Supplement                                                    | Thermo Fisher Scientific     | Cat#12587010                        |
| Neurobasal                                                        | Gibco                        | Cat#21103-049                       |
| DMEM/F12                                                          | Gibco                        | Cat#11320-074                       |
| DMEM                                                              | Gibco                        | Cat#41965-039                       |
| Knockout DMEM                                                     | Gibco                        | Cat#10829-018                       |
| Knockout serum replacement                                        | Gibco                        | Cat#10828-028                       |
| Normal Donkey serum                                               | Jackson ImmunoResearch       | Cat#017-000-121,<br>RRID:AB_2337258 |
| Human Plasma Fibronectin                                          | Millipore                    | Cat#FC010                           |
| EmbryoMax 0.1% Gelatin Solution                                   | Sigma Aldrich                | Cat#ES-006-B                        |
| Accutase solution                                                 | Sigma Aldrich                | Cat#A6964                           |
| Trypsin 0.05%                                                     | Gibco                        | Cat#25300-054                       |
| Cell Dissociation Solution                                        | Sigma Aldrich                | Cat#C5914                           |
| EmbryoMax® M2 Medium                                              | Sigma Aldrich                | Cat#MR-015-D                        |
| EmbryoMax® KSOM Mouse Embryo Media                                | Sigma Aldrich                | Cat#MR-121-D                        |
| RIPA buffer                                                       | Sigma Aldrich                | Cat#R0278                           |
| <b>Critical Commercial Assays</b>                                 |                              |                                     |
| GenElute™ Mammalian Total RNA Miniprep Kit                        | Sigma Aldrich                | Cat#RTN350                          |
| On-Column DNase I Digestion Set                                   | Sigma Aldrich                | Cat#DNASE70                         |
| iScript™ cDNA Synthesis Kit                                       | Bio-Rad                      | Cat#1708890                         |
| Arcturus® PicoPure® DNA Extraction Kit                            | Thermo Fisher Scientific     | Cat#KIT0103                         |
| KAPA Stranded RNA-Seq Library Preparation Kit Illumina® Platforms | Roche                        | Cat#7962207001                      |
| Qubit dsDNA HS Assay Kit                                          | Thermo Fisher Scientific     | Cat#Q32854                          |
| <b>Experimental Models: Cell lines</b>                            |                              |                                     |
| WT ESC                                                            | Merrill et al. 2004          | N/A                                 |
| Tcf7l1 KO ESC                                                     | Merrill et al. 2004          | N/A                                 |
| Tcf7 KO ESC                                                       | De Jaime-Soguero et al. 2017 | N/A                                 |
| Tcf7l1 OE ESC                                                     | Nishiyama et al. 2009        | N/A                                 |

|                                                         |                              |                                                                                                                                                                                                                         |
|---------------------------------------------------------|------------------------------|-------------------------------------------------------------------------------------------------------------------------------------------------------------------------------------------------------------------------|
| <b>Experimental Models:<br/>Organisms/Strains</b>       |                              |                                                                                                                                                                                                                         |
| Mouse/CD-1                                              | Envigo                       | 030                                                                                                                                                                                                                     |
| Mouse/B6D2F1                                            | Charles River                | 099                                                                                                                                                                                                                     |
| <b>Oligonucleotides</b>                                 |                              |                                                                                                                                                                                                                         |
| Primers for qRT-PCT                                     | See Supplementary Data 11    | Integrated DNA Technologies                                                                                                                                                                                             |
| Tcf7l1-targeting crRNA                                  | See Supplementary Data 11    | Integrated DNA Technologies                                                                                                                                                                                             |
| Tcf7l1 MiSeq primers                                    | See Supplementary Data 11    | Integrated DNA Technologies                                                                                                                                                                                             |
| <b>Software and Algorithms</b>                          |                              |                                                                                                                                                                                                                         |
| PySCENIC v0.9.15                                        | Sande et al. 2020            | <a href="https://github.com/aertslab/pySCENIC">https://github.com/aertslab/pySCENIC</a>                                                                                                                                 |
| Seurat v3.0.0                                           | Stuart et al. 2019           | <a href="https://github.com/satijalab/seurat">https://github.com/satijalab/seurat</a>                                                                                                                                   |
| Harmony v0.1.4                                          | Nowotschin et al. 2019       | <a href="https://github.com/dpeelab/Harmony">https://github.com/dpeelab/Harmony</a>                                                                                                                                     |
| Palantir v1.0.0                                         | Setty et al. 2019            | <a href="https://github.com/dpeelab/Palantir">https://github.com/dpeelab/Palantir</a>                                                                                                                                   |
| Cutadapt                                                | Martin 2011                  | <a href="http://code.google.com/p/cutadapt/">http://code.google.com/p/cutadapt/</a>                                                                                                                                     |
| HISAT2 v2.1.0                                           | Kim et al. 2019              | <a href="https://github.com/DaehwanKimLab/hisat2">https://github.com/DaehwanKimLab/hisat2</a>                                                                                                                           |
| FeatureCounts v2.0.1                                    | Liao et al. 2014             | <a href="http://subread.sourceforge.net">http://subread.sourceforge.net</a>                                                                                                                                             |
| DESeq2 v1.28.1                                          | Love et al. 2014             | <a href="http://www.bioconductor.org/packages/release/bioc/html/DESeq2.html">http://www.bioconductor.org/packages/release/bioc/html/DESeq2.html</a>                                                                     |
| ClueGO Cytoscape plug-in                                | Bindea et al. 2009           | <a href="http://www.ici.upmc.fr/cluego/cluegoDownload.shtml">http://www.ici.upmc.fr/cluego/cluegoDownload.shtml</a>                                                                                                     |
| Metascape                                               | Zhou et al. 2019             | <a href="http://metascape.org">http://metascape.org</a>                                                                                                                                                                 |
| GEM                                                     | N/A                          | <a href="http://groups.csail.mit.edu/cgs/gem/">http://groups.csail.mit.edu/cgs/gem/</a>                                                                                                                                 |
| g: Profiler                                             | Raudvere et al. 2019         | <a href="https://biit.cs.ut.ee/gprofiler">https://biit.cs.ut.ee/gprofiler</a>                                                                                                                                           |
| R v3.6.1                                                | N/A                          | <a href="https://www.r-project.org/">https://www.r-project.org/</a>                                                                                                                                                     |
| IGV Genome Browser                                      | Robinson et al. 2011         | <a href="https://software.broadinstitute.org/software/igv/">https://software.broadinstitute.org/software/igv/</a>                                                                                                       |
| QuantStudio™ Real-Time PCR Software v1.3                | N/A                          | <a href="https://www.thermofisher.com/be/en/home/global/forms/life-science/quantstudio-6-7-flex-software.html">https://www.thermofisher.com/be/en/home/global/forms/life-science/quantstudio-6-7-flex-software.html</a> |
| Harmony High-Content Imaging and Analysis Software v4.8 | PerkinElmer                  | N/A                                                                                                                                                                                                                     |
| Leica Application Suite v3.7.4                          | Leica Microsystems           | N/A                                                                                                                                                                                                                     |
| AxioVision SE64 Rel. 4.9.1                              | Zeiss                        | N/A                                                                                                                                                                                                                     |
| BATCH-GE                                                | Boel et al. 2016             | <a href="https://github.com/WouterSteyaert/BATCH-GE">https://github.com/WouterSteyaert/BATCH-GE</a>                                                                                                                     |
| FlowJo v10.7.1                                          | BD Biosciences               | N/A                                                                                                                                                                                                                     |
| ImageJ v1.8.0_172                                       | N/A                          | <a href="https://imagej.nih.gov/">https://imagej.nih.gov/</a>                                                                                                                                                           |
| GraphPad Prism v6.0                                     | N/A                          | <a href="https://www.graphpad.com/scientific-software/prism/">https://www.graphpad.com/scientific-software/prism/</a>                                                                                                   |
| <b>Deposited data</b>                                   |                              |                                                                                                                                                                                                                         |
| RNA-seq                                                 | This paper                   | GEO: GSE171204                                                                                                                                                                                                          |
| Chip-seq                                                | De Jaime-soguero et al. 2017 | E-MTAB-4358                                                                                                                                                                                                             |
| Single-cell RNA-seq                                     | Posfai et al. 2021           | GSE145609                                                                                                                                                                                                               |
| Single-cell RNA-seq                                     | Mohammed et al. 2017         | GSE100597                                                                                                                                                                                                               |
| Single-cell RNA-seq                                     | Nowotschin et al. 2019       | GSE123046                                                                                                                                                                                                               |
